# Supplementary material
Source: PubMed Central journal article supplement (PMC9867543)
Supplement: 10389_2023_1825_MOESM1_ESM.pdf [file 10389_2023_1825_MOESM1_ESM.pdf]

Association of socioeconomic status with cardiovascular disease and cardiovascular risk factors: A systematic review and meta-analysis

Tao Wang, Yilin Li, Xiaoqiang Zheng\*

\*Corresponding author: Xiaoqiang Zheng, School of Economics and Management, Southwest Petroleum University, Chengdu, China; Xiaoqiang\_Zheng@163.com

Online Resource 1 Search strategy

Search date: March 24, 2022 and a supplementary search was conducted on August 5, 2022.

Databases searched: Web of Science, PubMed, EMBASE, and Cochrane Library

Search Strategy in Web of science

| Number | Query                                                                                                                                                                                                                                                                                                                                                                                                                                                                                                                                                                                                                                                                                                                                                                                                                                                                                                                                | Results |
|--------|--------------------------------------------------------------------------------------------------------------------------------------------------------------------------------------------------------------------------------------------------------------------------------------------------------------------------------------------------------------------------------------------------------------------------------------------------------------------------------------------------------------------------------------------------------------------------------------------------------------------------------------------------------------------------------------------------------------------------------------------------------------------------------------------------------------------------------------------------------------------------------------------------------------------------------------|---------|
| #3     | #2 AND #1                                                                                                                                                                                                                                                                                                                                                                                                                                                                                                                                                                                                                                                                                                                                                                                                                                                                                                                            | 11842   |
| #2     | ((((((((((((TS=(myocardial infarction)) OR TS=(Infarction, Myocardial)) OR TS=(Infarctions, Myocardial)) OR TS=(Myocardial Infarctions)) OR TS=(Cardiovascular Stroke)) OR TS=(Cardiovascular Strokes)) OR TS=(Stroke, Cardiovascular)) OR TS=(Strokes, Cardiovascular)) OR TS=(Myocardial Infarct)) OR TS=(Infarct, Myocardial)) OR TS=(Infarcts, Myocardial)) OR TS=(Myocardial Infarcts)) OR TS=(Heart Attack)) OR TS=(Heart Attacks)                                                                                                                                                                                                                                                                                                                                                                                                                                                                                             | 761369  |
| #1     | ((((((((((((((((((((((((((((TS=(Socioeconomic Factors)) OR TS=(Factor, Socioeconomic)) OR TS=(Socioeconomic Factor)) OR TS=(Factors, Socioeconomic)) OR TS=(Standard of Living)) OR TS=(Living Standard)) OR TS=(Living Standards)) OR TS=(Land Tenure)) OR TS=(Tenure, Land)) OR TS=(Social Inequality)) OR TS=(Inequalities, Social)) OR TS=(Inequality, Social)) OR TS=(Social Inequalities)) OR TS=(High-Income Population)) OR TS=(High Income Population)) OR TS=(High-Income Populations)) OR TS=(Population, High-Income)) OR TS=(Populations, High-Income)) OR TS=(Social Class)) OR TS=(Class, Social)) OR TS=(Classes, Social)) OR TS=(Social Classes)) OR TS=(Socioeconomic Status)) OR TS=(Status, Socioeconomic)) OR TS=(Middle Class Population)) OR TS=(Class Population, Middle)) OR TS=(Class Populations, Middle)) OR TS=(Middle Class Populations)) OR TS=(Population, Middle Class)) OR TS=(Populations, Middle | 678145  |

|  |                                       |  |
|--|---------------------------------------|--|
|  | Class)) OR TS=(Caste)) OR TS=(Castes) |  |
|--|---------------------------------------|--|

**11842 Results**

**Search Strategy in PUBMED**

| Search number | Query                                                                                                                                                                                                                                                                                                                                                                                                                                                                                                                                                                                                                                                                                                                                                                                                                                                                                                                                                                                                                                   | Search Details                                                                                                                                                                                                                                                                                                                                                                                                                                                                                                                                                                                                                                                                                                                                                                                                                                                                                                                                                                                                                                                                                                                                                                                                   | Results |
|---------------|-----------------------------------------------------------------------------------------------------------------------------------------------------------------------------------------------------------------------------------------------------------------------------------------------------------------------------------------------------------------------------------------------------------------------------------------------------------------------------------------------------------------------------------------------------------------------------------------------------------------------------------------------------------------------------------------------------------------------------------------------------------------------------------------------------------------------------------------------------------------------------------------------------------------------------------------------------------------------------------------------------------------------------------------|------------------------------------------------------------------------------------------------------------------------------------------------------------------------------------------------------------------------------------------------------------------------------------------------------------------------------------------------------------------------------------------------------------------------------------------------------------------------------------------------------------------------------------------------------------------------------------------------------------------------------------------------------------------------------------------------------------------------------------------------------------------------------------------------------------------------------------------------------------------------------------------------------------------------------------------------------------------------------------------------------------------------------------------------------------------------------------------------------------------------------------------------------------------------------------------------------------------|---------|
| 3             | (("Myocardial Infarction"[Mesh]) OR<br>(((((((((((((Infarction, Myocardial[Title/Abstract]) OR<br>(Infarctions, Myocardial[Title/Abstract])) OR (Myocardial<br>Infarctions[Title/Abstract])) OR (Cardiovascular<br>Stroke[Title/Abstract])) OR (Cardiovascular<br>Strokes[Title/Abstract])) OR (Stroke,<br>Cardiovascular[Title/Abstract])) OR (Stroke,<br>Cardiovascular[Title/Abstract])) OR (Strokes,<br>Cardiovascular[Title/Abstract])) OR (Myocardial<br>Infarct[Title/Abstract])) OR (Infarct,<br>Myocardial[Title/Abstract])) OR (Infarcts,<br>Myocardial[Title/Abstract])) OR (Myocardial<br>Infarcts[Title/Abstract])) OR (Heart<br>Attack[Title/Abstract])) OR (Heart<br>Attacks[Title/Abstract])) AND<br>(((((((((((((((((((((((((((((((((((((((Socioeconomic<br>Factors[Title/Abstract]) OR (Factor,<br>Socioeconomic[Title/Abstract])) OR (Socioeconomic<br>Factor[Title/Abstract])) OR (Factors,<br>Socioeconomic[Title/Abstract])) OR (Standard of<br>Living[Title/Abstract])) OR (Living<br>Standard[Title/Abstract])) | ("Myocardial Infarction"[MeSH Terms] OR ("infarction<br>myocardial"[Title/Abstract] OR "infarctions<br>myocardial"[Title/Abstract] OR "myocardial<br>infarctions"[Title/Abstract] OR "cardiovascular<br>stroke"[Title/Abstract] OR ("cardiovascular system"[MeSH<br>Terms] OR ("Cardiovascular"[All Fields] AND "system"[All<br>Fields]) OR "cardiovascular system"[All Fields] OR<br>"Cardiovascular"[All Fields] OR "cardiovasculars"[All Fields])<br>AND "Strokes"[Title/Abstract]) OR "stroke<br>cardiovascular"[Title/Abstract] OR "stroke<br>cardiovascular"[Title/Abstract] OR "strokes<br>cardiovascular"[Title/Abstract] OR "myocardial<br>infarct"[Title/Abstract] OR "infarct myocardial"[Title/Abstract]<br>OR "infarcts myocardial"[Title/Abstract] OR "myocardial<br>infarcts"[Title/Abstract] OR "heart attack"[Title/Abstract] OR<br>"heart attacks"[Title/Abstract])) AND ("Socioeconomic<br>Factors"[Title/Abstract] OR "factor<br>socioeconomic"[Title/Abstract] OR "socioeconomic<br>factor"[Title/Abstract] OR "factors<br>socioeconomic"[Title/Abstract] OR "standard of<br>living"[Title/Abstract] OR "living standard"[Title/Abstract] OR<br>"living standards"[Title/Abstract] OR "land | 2567    |

|  |                                                                                                                                                                                                                                                                                                                                                                                                                                                                                                                                                                                                                                                                                                                                                                                                                                                                                                                                                                                                                                                                                                                                                                                                                      |                                                                                                                                                                                                                                                                                                                                                                                                                                                                                                                                                                                                                                                                                                                                                                                                                                                                                                                                                                                                                                                                                                                                                                                                                                                                                                                                                                                                                                                                                                                                                                                                                                                                                                                                                                                                                                      |  |
|--|----------------------------------------------------------------------------------------------------------------------------------------------------------------------------------------------------------------------------------------------------------------------------------------------------------------------------------------------------------------------------------------------------------------------------------------------------------------------------------------------------------------------------------------------------------------------------------------------------------------------------------------------------------------------------------------------------------------------------------------------------------------------------------------------------------------------------------------------------------------------------------------------------------------------------------------------------------------------------------------------------------------------------------------------------------------------------------------------------------------------------------------------------------------------------------------------------------------------|--------------------------------------------------------------------------------------------------------------------------------------------------------------------------------------------------------------------------------------------------------------------------------------------------------------------------------------------------------------------------------------------------------------------------------------------------------------------------------------------------------------------------------------------------------------------------------------------------------------------------------------------------------------------------------------------------------------------------------------------------------------------------------------------------------------------------------------------------------------------------------------------------------------------------------------------------------------------------------------------------------------------------------------------------------------------------------------------------------------------------------------------------------------------------------------------------------------------------------------------------------------------------------------------------------------------------------------------------------------------------------------------------------------------------------------------------------------------------------------------------------------------------------------------------------------------------------------------------------------------------------------------------------------------------------------------------------------------------------------------------------------------------------------------------------------------------------------|--|
|  | Standards[Title/Abstract])) OR (Land<br>Tenure[Title/Abstract])) OR (Tenure,<br>Land[Title/Abstract])) OR (Social<br>Inequality[Title/Abstract])) OR (Inequalities,<br>Social[Title/Abstract])) OR (Inequality,<br>Social[Title/Abstract])) OR (Social<br>Inequalities[Title/Abstract])) OR (High-Income<br>Population[Title/Abstract])) OR (High Income<br>Population[Title/Abstract])) OR (High-Income<br>Populations[Title/Abstract])) OR (Population,<br>High-Income[Title/Abstract])) OR (Populations,<br>High-Income[Title/Abstract])) OR (Social<br>Class[Title/Abstract])) OR (Class, Social[Title/Abstract]))<br>OR (Classes, Social[Title/Abstract])) OR (Social<br>Classes[Title/Abstract])) OR (Socioeconomic<br>Status[Title/Abstract])) OR (Status,<br>Socioeconomic[Title/Abstract])) OR (Middle Class<br>Population[Title/Abstract])) OR (Class Population,<br>Middle[Title/Abstract])) OR (Class Populations,<br>Middle[Title/Abstract])) OR (Middle Class<br>Populations[Title/Abstract])) OR (Population, Middle<br>Class[Title/Abstract])) OR (Populations, Middle<br>Class[Title/Abstract])) OR (Caste[Title/Abstract])) OR<br>(Castes[Title/Abstract])) OR ("Socioeconomic<br>Factors"[Mesh])) | tenure"[Title/Abstract] OR "tenure land"[Title/Abstract] OR<br>"social inequality"[Title/Abstract] OR "inequalities<br>social"[Title/Abstract] OR "inequality social"[Title/Abstract] OR<br>"social inequalities"[Title/Abstract] OR "high income<br>population"[Title/Abstract] OR "high income<br>population"[Title/Abstract] OR "high income<br>populations"[Title/Abstract] OR "population high<br>income"[Title/Abstract] OR (("populate"[All Fields] OR<br>"populated"[All Fields] OR "populates"[All Fields] OR<br>"populating"[All Fields] OR "Population"[MeSH Terms] OR<br>"Population"[All Fields] OR "population groups"[MeSH Terms]<br>OR ("Population"[All Fields] AND "groups"[All Fields]) OR<br>"population groups"[All Fields] OR "Populations"[All Fields]<br>OR "population s"[All Fields] OR "populational"[All Fields] OR<br>"populous"[All Fields]) AND "High-Income"[Title/Abstract])<br>OR "social class"[Title/Abstract] OR "class<br>social"[Title/Abstract] OR "classes social"[Title/Abstract] OR<br>"social classes"[Title/Abstract] OR "socioeconomic<br>status"[Title/Abstract] OR "status socioeconomic"[Title/Abstract]<br>OR "middle class population"[Title/Abstract] OR ("Class"[All<br>Fields] OR "classe"[All Fields] OR "classed"[All Fields] OR<br>"Classes"[All Fields]) AND "population middle"[Title/Abstract])<br>OR ("Class"[All Fields] OR "classe"[All Fields] OR<br>"classed"[All Fields] OR "Classes"[All Fields]) AND<br>"populations middle"[Title/Abstract]) OR "middle class<br>populations"[Title/Abstract] OR "population middle<br>class"[Title/Abstract] OR (("populate"[All Fields] OR<br>"populated"[All Fields] OR "populates"[All Fields] OR<br>"populating"[All Fields] OR "Population"[MeSH Terms] OR<br>"Population"[All Fields] OR "population groups"[MeSH Terms] |  |
|--|----------------------------------------------------------------------------------------------------------------------------------------------------------------------------------------------------------------------------------------------------------------------------------------------------------------------------------------------------------------------------------------------------------------------------------------------------------------------------------------------------------------------------------------------------------------------------------------------------------------------------------------------------------------------------------------------------------------------------------------------------------------------------------------------------------------------------------------------------------------------------------------------------------------------------------------------------------------------------------------------------------------------------------------------------------------------------------------------------------------------------------------------------------------------------------------------------------------------|--------------------------------------------------------------------------------------------------------------------------------------------------------------------------------------------------------------------------------------------------------------------------------------------------------------------------------------------------------------------------------------------------------------------------------------------------------------------------------------------------------------------------------------------------------------------------------------------------------------------------------------------------------------------------------------------------------------------------------------------------------------------------------------------------------------------------------------------------------------------------------------------------------------------------------------------------------------------------------------------------------------------------------------------------------------------------------------------------------------------------------------------------------------------------------------------------------------------------------------------------------------------------------------------------------------------------------------------------------------------------------------------------------------------------------------------------------------------------------------------------------------------------------------------------------------------------------------------------------------------------------------------------------------------------------------------------------------------------------------------------------------------------------------------------------------------------------------|--|



|   |                                                                                                                                                                                                                                                                                                                                                                                                                                                                                                                                                                |                                                                                                                                                                                                                                                                                                                                                                                                                                                                                                                                                                                                                                                                                                                                                                                                                                                                                                                                                                                                                                                               |        |
|---|----------------------------------------------------------------------------------------------------------------------------------------------------------------------------------------------------------------------------------------------------------------------------------------------------------------------------------------------------------------------------------------------------------------------------------------------------------------------------------------------------------------------------------------------------------------|---------------------------------------------------------------------------------------------------------------------------------------------------------------------------------------------------------------------------------------------------------------------------------------------------------------------------------------------------------------------------------------------------------------------------------------------------------------------------------------------------------------------------------------------------------------------------------------------------------------------------------------------------------------------------------------------------------------------------------------------------------------------------------------------------------------------------------------------------------------------------------------------------------------------------------------------------------------------------------------------------------------------------------------------------------------|--------|
|   | Population[Title/Abstract])) OR (Class Population, Middle[Title/Abstract])) OR (Class Populations, Middle[Title/Abstract])) OR (Middle Class Populations[Title/Abstract])) OR (Population, Middle Class[Title/Abstract])) OR (Populations, Middle Class[Title/Abstract])) OR (Caste[Title/Abstract])) OR (Castes[Title/Abstract])) OR ("Socioeconomic Factors"[Mesh])                                                                                                                                                                                          | status"[Title/Abstract] OR "status socioeconomic"[Title/Abstract] OR "middle class population"[Title/Abstract] OR (("Class"[All Fields] OR "classe"[All Fields] OR "classed"[All Fields] OR "Classes"[All Fields]) AND "population middle"[Title/Abstract]) OR (("Class"[All Fields] OR "classe"[All Fields] OR "classed"[All Fields] OR "Classes"[All Fields]) AND "populations middle"[Title/Abstract]) OR "middle class populations"[Title/Abstract] OR "population middle class"[Title/Abstract] OR (("populate"[All Fields] OR "populated"[All Fields] OR "populates"[All Fields] OR "populating"[All Fields] OR "Population"[MeSH Terms] OR "Population"[All Fields] OR "population groups"[MeSH Terms] OR ("Population"[All Fields] AND "groups"[All Fields]) OR "population groups"[All Fields] OR "Populations"[All Fields] OR "population s"[All Fields] OR "populational"[All Fields] OR "populous"[All Fields]) AND "middle class"[Title/Abstract]) OR "Caste"[Title/Abstract] OR "Castes"[Title/Abstract] OR "Socioeconomic Factors"[MeSH Terms] |        |
| 1 | ("Myocardial Infarction"[Mesh]) OR (((((((((((Infarction, Myocardial[Title/Abstract]) OR (Infarctions, Myocardial[Title/Abstract])) OR (Myocardial Infarctions[Title/Abstract])) OR (Cardiovascular Stroke[Title/Abstract])) OR (Cardiovascular Strokes[Title/Abstract])) OR (Stroke, Cardiovascular[Title/Abstract])) OR (Stroke, Cardiovascular[Title/Abstract])) OR (Strokes, Cardiovascular[Title/Abstract])) OR (Myocardial Infarct[Title/Abstract])) OR (Infarct, Myocardial[Title/Abstract])) OR (Infarcts, Myocardial[Title/Abstract])) OR (Myocardial | "Myocardial Infarction"[MeSH Terms] OR ("infarction myocardial"[Title/Abstract] OR "infarctions myocardial"[Title/Abstract] OR "myocardial infarctions"[Title/Abstract] OR "cardiovascular stroke"[Title/Abstract] OR ("cardiovascular system"[MeSH Terms] OR ("Cardiovascular"[All Fields] AND "system"[All Fields]) OR "cardiovascular system"[All Fields] OR "Cardiovascular"[All Fields] OR "cardiovasculars"[All Fields]) AND "Strokes"[Title/Abstract]) OR "stroke cardiovascular"[Title/Abstract] OR "stroke cardiovascular"[Title/Abstract] OR "strokes cardiovascular"[Title/Abstract] OR "myocardial                                                                                                                                                                                                                                                                                                                                                                                                                                                | 201671 |

|                                                                                     |          |                  |                                                                                                                                                                                                                                   |  |
|-------------------------------------------------------------------------------------|----------|------------------|-----------------------------------------------------------------------------------------------------------------------------------------------------------------------------------------------------------------------------------|--|
| Infarcts[Title/Abstract]))<br>Attack[Title/Abstract]))<br>Attacks[Title/Abstract])) | OR<br>OR | (Heart<br>(Heart | infarct"[Title/Abstract] OR "infarct myocardial"[Title/Abstract]<br>OR "infarcts myocardial"[Title/Abstract] OR "myocardial<br>infarcts"[Title/Abstract] OR "heart attack"[Title/Abstract] OR<br>"heart attacks"[Title/Abstract]) |  |
|-------------------------------------------------------------------------------------|----------|------------------|-----------------------------------------------------------------------------------------------------------------------------------------------------------------------------------------------------------------------------------|--|

## 2567 Results

### Search Strategy in Embase

| No. | Query                                                                                                                                                                                                                                                                                                                                                                                                                                                                                                                                                                                                                                                                                                                                                                                                                                                                                                                                                                                                                                                                                              | Results |
|-----|----------------------------------------------------------------------------------------------------------------------------------------------------------------------------------------------------------------------------------------------------------------------------------------------------------------------------------------------------------------------------------------------------------------------------------------------------------------------------------------------------------------------------------------------------------------------------------------------------------------------------------------------------------------------------------------------------------------------------------------------------------------------------------------------------------------------------------------------------------------------------------------------------------------------------------------------------------------------------------------------------------------------------------------------------------------------------------------------------|---------|
| #7  | #3 AND #6                                                                                                                                                                                                                                                                                                                                                                                                                                                                                                                                                                                                                                                                                                                                                                                                                                                                                                                                                                                                                                                                                          | 18849   |
| #6  | #4 OR #5                                                                                                                                                                                                                                                                                                                                                                                                                                                                                                                                                                                                                                                                                                                                                                                                                                                                                                                                                                                                                                                                                           | 484962  |
| #5  | 'heart infarction':ti,ab,kw OR 'myocardial infarction':ti,ab,kw OR 'infarction, myocardial':ti,ab,kw OR 'infarctions, myocardial':ti,ab,kw OR 'myocardial infarctions':ti,ab,kw OR 'cardiovascular stroke':ti,ab,kw OR 'cardiovascular strokes':ti,ab,kw OR 'stroke, cardiovascular':ti,ab,kw OR 'strokes, cardiovascular':ti,ab,kw OR 'myocardial infarct':ti,ab,kw OR 'infarct, myocardial':ti,ab,kw OR 'infarcts, myocardial':ti,ab,kw OR 'myocardial infarcts':ti,ab,kw OR 'heart attack':ti,ab,kw OR 'heart attacks':ti,ab,kw                                                                                                                                                                                                                                                                                                                                                                                                                                                                                                                                                                 | 328840  |
| #4  | 'heart infarction'/exp                                                                                                                                                                                                                                                                                                                                                                                                                                                                                                                                                                                                                                                                                                                                                                                                                                                                                                                                                                                                                                                                             | 434275  |
| #3  | #1 OR #2                                                                                                                                                                                                                                                                                                                                                                                                                                                                                                                                                                                                                                                                                                                                                                                                                                                                                                                                                                                                                                                                                           | 1209281 |
| #2  | 'factor, socioeconomic':ti,ab,kw OR 'socioeconomic factor':ti,ab,kw OR 'factors, socioeconomic':ti,ab,kw OR 'standard of living':ti,ab,kw OR 'living standard':ti,ab,kw OR 'living standards':ti,ab,kw OR 'land tenure':ti,ab,kw OR 'tenure, land':ti,ab,kw OR 'social inequality':ti,ab,kw OR 'inequalities, social':ti,ab,kw OR 'inequality, social':ti,ab,kw OR 'social inequalities':ti,ab,kw OR 'high-income population':ti,ab,kw OR 'high income population':ti,ab,kw OR 'high-income populations':ti,ab,kw OR 'population, high-income':ti,ab,kw OR 'populations, high-income':ti,ab,kw OR 'social class':ti,ab,kw OR 'class, social':ti,ab,kw OR 'classes, social':ti,ab,kw OR 'social classes':ti,ab,kw OR 'socioeconomic status':ti,ab,kw OR 'status, socioeconomic':ti,ab,kw OR 'middle class population':ti,ab,kw OR 'class population, middle':ti,ab,kw OR 'class populations, middle':ti,ab,kw OR 'middle class populations':ti,ab,kw OR 'population, middle class':ti,ab,kw OR 'populations, middle class':ti,ab,kw OR caste:ti,ab,kw OR castes:ti,ab,kw OR socioeconomics:ti,ab,kw | 83249   |
| #1  | 'socioeconomics'/exp                                                                                                                                                                                                                                                                                                                                                                                                                                                                                                                                                                                                                                                                                                                                                                                                                                                                                                                                                                                                                                                                               | 1158697 |

## 18849 Results

### Search Strategy in the Cochrane Library

| Number | Query                                                                                                                                                                                             | Results |
|--------|---------------------------------------------------------------------------------------------------------------------------------------------------------------------------------------------------|---------|
| #15    | #9 and #14                                                                                                                                                                                        | 487     |
| #14    | #10 or #11 or #12 or #13                                                                                                                                                                          | 40860   |
| #13    | (Infarcts, Myocardial):ti,ab,kw OR (Myocardial Infarcts):ti,ab,kw OR (Heart Attack):ti,ab,kw OR (Heart Attacks):ti,ab,kw                                                                          | 4130    |
| #12    | (Cardiovascular Strokes):ti,ab,kw OR (Stroke, Cardiovascular):ti,ab,kw OR (Strokes, Cardiovascular):ti,ab,kw OR (Myocardial Infarct):ti,ab,kw OR (Infarct, Myocardial):ti,ab,kw                   | 13960   |
| #11    | (myocardial infarction):ti,ab,kw OR (Infarction, Myocardial):ti,ab,kw OR (Infarctions, Myocardial):ti,ab,kw OR (Myocardial Infarctions):ti,ab,kw OR (Cardiovascular Stroke):ti,ab,kw              | 38306   |
| #10    | MeSH descriptor: [Myocardial Infarction] explode all trees                                                                                                                                        | 11661   |
| #9     | #1 or #2 or #3 or #4 or #5 or #6 or #7 or #8                                                                                                                                                      | 24018   |
| #8     | (Caste):ti,ab,kw OR (Castes):ti,ab,kw                                                                                                                                                             | 175     |
| #7     | (Class Population, Middle):ti,ab,kw OR (Class Populations, Middle):ti,ab,kw OR (Middle Class Populations):ti,ab,kw OR (Population, Middle Class):ti,ab,kw OR (Populations, Middle Class):ti,ab,kw | 941     |
| #6     | (Classes, Social):ti,ab,kw OR (Social Classes):ti,ab,kw OR (Socioeconomic Status):ti,ab,kw OR (Status, Socioeconomic):ti,ab,kw OR (Middle Class Population):ti,ab,kw                              | 6370    |
| #5     | (High-Income Populations):ti,ab,kw OR (Population, High-Income):ti,ab,kw OR (Social Class):ti,ab,kw OR (Populations, High-Income):ti,ab,kw OR (Class, Social):ti,ab,kw                            | 2661    |

|    |                                                                                                                                                                               |       |
|----|-------------------------------------------------------------------------------------------------------------------------------------------------------------------------------|-------|
| #4 | (Inequalities, Social):ti,ab,kw OR (Inequality, Social):ti,ab,kw OR (Social Inequalities):ti,ab,kw OR (High-Income Population):ti,ab,kw OR (High Income Population):ti,ab,kw  | 1525  |
| #3 | (Living Standard):ti,ab,kw OR (Living Standards):ti,ab,kw OR (Land Tenure):ti,ab,kw OR (Tenure, Land):ti,ab,kw OR (Social Inequality):ti,ab,kw                                | 5585  |
| #2 | (Socioeconomic Factors):ti,ab,kw OR (Factor, Socioeconomic):ti,ab,kw OR (Socioeconomic Factor):ti,ab,kw OR (Factors, Socioeconomic):ti,ab,kw OR (Standard of Living):ti,ab,kw | 10540 |
| #1 | MeSH descriptor: [Socioeconomic Factors] explode all trees                                                                                                                    | 10561 |

#### 487 Results
