# Supplementary material
Source: PubMed Central journal article supplement (PMC9867543)
Supplement: 10389_2023_1825_MOESM2_ESM.pdf [file 10389_2023_1825_MOESM2_ESM.pdf]

(JOURNAL OF PUBLIC HEALTH)

**Association of socioeconomic status with cardiovascular disease and cardiovascular risk factors: A systematic review and meta-analysis**

Tao Wang, Yilin Li, Xiaoqiang Zheng\*

\*corresponding author: Xiaoqiang Zheng, School of Economics and Management, Southwest Petroleum University, Chengdu, China; Xiaoqiang\_Zheng@163.com

**Online Resource 2 Quality assessment of the included studies using the NIH-QAT**

| No | Title                                                                                                                                                                                                                                                                                     | Author (year)             | Item 1 | Item 2 | Item 3 | Item 4 | Item 5 | Item 6 | Item 7 | Item 8 | Item 9 | Item 10 | Item 11 | Item 12 | Item 13 | Item 14 | Overall Quality  |
|----|-------------------------------------------------------------------------------------------------------------------------------------------------------------------------------------------------------------------------------------------------------------------------------------------|---------------------------|--------|--------|--------|--------|--------|--------|--------|--------|--------|---------|---------|---------|---------|---------|------------------|
| 1  | Low socioeconomic status increases short-term mortality of acute myocardial infarction despite universal health coverage<br>The relation between socioeconomic status and short-term mortality after acute myocardial infarction persists in the elderly: Results from a nationwide study | Wang et al.(2014)         | Y      | Y      | Y      | Y      | Y      | Y      | Y      | Y      | Y      | NA      | Y       | NA      | Y       | Y       | low risk of bias |
| 2  |                                                                                                                                                                                                                                                                                           | Van Oeffelen et al.(2012) | Y      | Y      | Y      | Y      | Y      | Y      | Y      | Y      | Y      | NA      | Y       | NA      | Y       | Y       | low risk of bias |

|   |                                                                                                                                                                                      |                       |   |   |   |   |   |   |   |   |   |   |    |   |    |    |   |                  |
|---|--------------------------------------------------------------------------------------------------------------------------------------------------------------------------------------|-----------------------|---|---|---|---|---|---|---|---|---|---|----|---|----|----|---|------------------|
| 3 | Neighbourhood socioeconomic inequalities in incidence of acute myocardial infarction: a cohort study quantifying age- and gender-specific differences in relative and absolute terms | Koopman et al.(2012)  | Y | Y | Y | Y | Y | Y | Y | Y | Y | Y | NA | Y | NA | Y  | Y | low risk of bias |
| 4 | Social inequalities in mild and severe myocardial infarction: how large is the gap in health expectancies?                                                                           | Tetzlaff et al.(2021) | Y | Y | Y | Y | Y | Y | Y | Y | Y | Y | NA | Y | NA | NR | Y | low risk of bias |
| 5 | Health inequalities in terms of myocardial infarction and all-cause mortality: a study with German claims data covering 2006 to 2015                                                 | Geyer et al.(2019)    | Y | Y | Y | Y | Y | Y | Y | Y | Y | Y | NA | Y | NA | Y  | Y | low risk of bias |

|   |                                                                                                                                                             |                     |   |   |   |   |   |   |   |   |   |   |    |   |    |   |   |                  |
|---|-------------------------------------------------------------------------------------------------------------------------------------------------------------|---------------------|---|---|---|---|---|---|---|---|---|---|----|---|----|---|---|------------------|
| 6 | Relationship between the shift of socioeconomic status and cardiovascular mortality                                                                         | Sung et al.(2020)   | Y | Y | Y | Y | Y | Y | Y | Y | Y | Y | NA | Y | NA | Y | Y | low risk of bias |
| 7 | Socioeconomic and behavioral determinants of cardiovascular diseases among older adults in Belgium and France: A longitudinal analysis from the SHARE study | Hassen et al.(2020) | Y | Y | Y | Y | Y | Y | Y | Y | Y | Y | NA | Y | NA | Y | Y | low risk of bias |
| 8 | Neighborhood socioeconomic context and long-term survival after myocardial infarction                                                                       | Gerber et al.(2010) | Y | Y | Y | Y | Y | Y | Y | Y | Y | Y | NA | Y | NA | Y | Y | low risk of bias |
| 9 | Socioeconomic status and depression as combined risk factors for acute myocardial infarction and stroke: A population-based study of 2.7                    | Cho et al.(2019)    | Y | Y | Y | Y | Y | Y | Y | Y | Y | Y | NA | Y | NA | Y | Y | low risk of bias |

|    | million Korean adults                                                                                                                                                      |                          |   |   |   |   |   |   |   |   |   |   |    |   |    |   |   |                  |
|----|----------------------------------------------------------------------------------------------------------------------------------------------------------------------------|--------------------------|---|---|---|---|---|---|---|---|---|---|----|---|----|---|---|------------------|
| 10 | Socioeconomic Status, Functional Recovery, and Long-Term Mortality among Surviving Acute Myocardial Infarction                                                             | Alter et al.(2013)       | Y | Y | Y | Y | Y | Y | Y | Y | Y | Y | NA | Y | NA | Y | Y | low risk of bias |
| 11 | Socioeconomic status and risk of cardiovascular disease in 20 low-income, middle-income, and high-income countries: the Prospective Urban Rural Epidemiologic (PURE) study | Rosengren et al.(2019)   | Y | Y | Y | Y | Y | Y | Y | Y | Y | Y | NA | Y | NA | Y | Y | low risk of bias |
| 12 | Socioeconomic status and incident cardiovascular disease in a developing country: findings from the Isfahan                                                                | Masoudkabar et al.(2012) | Y | Y | Y | Y | Y | Y | Y | Y | Y | Y | NA | Y | NA | Y | Y | low risk of bias |

cohort study  
(ICS)

|    |                                                                                                                                                                                                                                                       |                      |   |   |   |   |   |   |   |   |   |   |    |   |    |   |   |                  |
|----|-------------------------------------------------------------------------------------------------------------------------------------------------------------------------------------------------------------------------------------------------------|----------------------|---|---|---|---|---|---|---|---|---|---|----|---|----|---|---|------------------|
| 13 | Outcomes among 3.5 million newly diagnosed hypertensive Canadians<br>Recurrent Atherosclerotic Cardiovascular Event Rates Differ Among Patients Meeting the Very High Risk Definition According to Age, Sex, Race/Ethnicity, and Socioeconomic Status | Quan et al.(2013)    | Y | Y | Y | Y | Y | Y | Y | Y | Y | Y | NA | Y | NA | Y | Y | low risk of bias |
| 14 | Midlife wealth mobility and long-term cardiovascular health                                                                                                                                                                                           | An et al.(2020)      | Y | Y | Y | Y | Y | Y | Y | Y | Y | Y | NA | Y | NA | Y | Y | low risk of bias |
| 15 | Socio-economic status and 1 year mortality among patients hospitalized for                                                                                                                                                                            | Machado et al.(2021) | Y | Y | Y | Y | Y | Y | Y | Y | Y | Y | NA | Y | NA | Y | Y | low risk of bias |
| 16 |                                                                                                                                                                                                                                                       | Ge et al.(2022)      | Y | Y | Y | Y | Y | Y | Y | Y | Y | Y | NA | Y | NA | Y | Y | low risk of bias |

|    | heart failure in<br>China                                                                                       |                        |   |   |   |   |   |   |   |   |   |   |    |   |    |    |   |                  |
|----|-----------------------------------------------------------------------------------------------------------------|------------------------|---|---|---|---|---|---|---|---|---|---|----|---|----|----|---|------------------|
| 17 | Socioeconomic status and mortality after acute myocardial infarction: A study from Iran<br>Early-life and adult | Donyavi et al.(2011)   | Y | Y | Y | Y | Y | Y | Y | Y | Y | Y | NA | Y | NA | NR | Y | low risk of bias |
| 18 | socioeconomic determinants of myocardial infarction incidence and fatality<br>Life course analysis on           | Kilpi et al.(2017)     | Y | Y | Y | Y | Y | Y | Y | Y | Y | Y | NA | Y | NA | Y  | Y | low risk of bias |
| 19 | incident AMI: a Danish register-based cohort study<br>Disentangling the relative importance of                  | Kriegbaum et al.(2019) | Y | Y | Y | Y | Y | Y | Y | Y | Y | Y | NA | Y | NA | Y  | Y | low risk of bias |
| 20 | different socioeconomic resources for myocardial infarction incidence and                                       | Kilpi et al.(2016)     | Y | Y | Y | Y | Y | Y | Y | Y | Y | Y | NA | Y | NA | Y  | Y | low risk of bias |

survival: a longitudinal study of over 300,000 Finnish adults

|    |                                                                                                                                                                                           |                         |   |   |   |   |   |   |   |   |   |   |    |   |    |   |   |                  |
|----|-------------------------------------------------------------------------------------------------------------------------------------------------------------------------------------------|-------------------------|---|---|---|---|---|---|---|---|---|---|----|---|----|---|---|------------------|
| 21 | The role of health-related behavioural factors in accounting for inequalities in coronary heart disease risk by education and area deprivation: prospective study of 1.2 million UK women | Floud et al.(2016)      | Y | Y | Y | Y | Y | Y | Y | Y | Y | Y | NA | Y | NA | Y | Y | low risk of bias |
| 22 | A small-area ecologic study of myocardial infarction, neighborhood deprivation, and sex: A bayesian modeling approach                                                                     | Deguen et al.(2010)     | Y | Y | Y | Y | Y | Y | Y | Y | Y | Y | NA | Y | NA | Y | Y | low risk of bias |
| 23 | Performance of the Atherosclerotic Cardiovascular Disease Pooled Cohort Risk                                                                                                              | Colantonio et al.(2017) | Y | Y | Y | Y | Y | Y | Y | Y | Y | Y | NA | Y | NA | Y | Y | low risk of bias |

|    | Equations by Social Deprivation Status                                                                                                                   |                     |   |   |   |   |   |   |   |   |   |   |    |   |    |   |   |                  |
|----|----------------------------------------------------------------------------------------------------------------------------------------------------------|---------------------|---|---|---|---|---|---|---|---|---|---|----|---|----|---|---|------------------|
| 24 | Impact of area deprivation on the cardiac mortality in the UK between 1991 and 2010: evidence from a population-based longitudinal study                 | Jin et al.(2021)    | Y | Y | Y | Y | Y | Y | Y | Y | Y | Y | NA | Y | NA | Y | Y | low risk of bias |
| 25 | The impact of social deprivation on mortality following acute myocardial infarction, stroke or subarachnoid haemorrhage: A record linkage study          | Thorne et al.(2015) | Y | Y | Y | Y | Y | Y | Y | Y | Y | Y | NA | Y | NA | Y | Y | low risk of bias |
| 26 | Individual education, area income, and mortality and recurrence of myocardial infarction in a Medicare cohort: the National Longitudinal Mortality Study | Coady et al.(2014)  | Y | Y | Y | Y | Y | Y | Y | Y | Y | Y | NA | Y | NA | Y | Y | low risk of bias |



|    |                                                                                                                                                                     |                          |   |   |   |   |   |   |   |   |   |   |    |   |    |    |   |                  |
|----|---------------------------------------------------------------------------------------------------------------------------------------------------------------------|--------------------------|---|---|---|---|---|---|---|---|---|---|----|---|----|----|---|------------------|
| 27 | Socioeconomic differences in incidence and relative survival after a first acute myocardial infarction in the Basque Country, Spain                                 | Machón et al.(2012)      | Y | Y | Y | Y | Y | Y | Y | Y | Y | Y | NA | Y | NA | Y  | Y | low risk of bias |
| 28 | Impact of Socioeconomic Deprivation and Area of Residence on Access to Coronary Revascularization and Mortality After a First Acute Myocardial Infarction in Québec | Christensen et al.(2011) | Y | Y | Y | Y | Y | Y | Y | Y | Y | Y | NA | Y | NA | NR | Y | low risk of bias |
| 29 | Level of education and risk of heart failure: a prospective cohort study with echocardiography evaluation                                                           | Blais et al.(2012)       | Y | Y | Y | Y | Y | Y | Y | Y | Y | Y | NA | Y | NA | NR | Y | low risk of bias |

|    |                                                                                                   |                       |   |   |   |   |   |   |   |   |   |   |    |   |    |    |   |                  |
|----|---------------------------------------------------------------------------------------------------|-----------------------|---|---|---|---|---|---|---|---|---|---|----|---|----|----|---|------------------|
| 30 | Acute myocardial infarction: Does survival depend on geographical location and social background? | Kjærulff et al.(2019) | Y | Y | Y | Y | Y | Y | Y | Y | Y | Y | NA | Y | NA | NR | Y | low risk of bias |
| 31 | Socio-economic factors & longevity in a cohort of Kerala State, India                             | Sauvaget et al.(2011) | Y | Y | Y | Y | Y | Y | Y | Y | Y | Y | NA | Y | NA | Y  | Y | low risk of bias |

Abbreviation: Y, yes. N, no. NR, not reported. NA, not applicable.

NIH-CAT: National Institutes of Health Quality Assessment Tool for Observational Cohort and Cross-Sectional Studies

Item 1: Was the research question or objective in this paper clearly stated?

Item 2: Was the study population clearly specified and defined?

Item 3: Was the participation rate of eligible persons at least 50%?

Item 4: Were all the subjects selected or recruited from the same or similar populations (including the same time period)? Were inclusion and exclusion criteria for being in the study prespecified and applied uniformly to all participants?

Item 5: Was a sample size justification, power description, or variance and effect estimates provided?

Item 6: For the analyses in this paper, were the exposure(s) of interest measured prior to the outcome(s) being measured?

Item 7: Was the timeframe sufficient so that one could reasonably expect to see an association between exposure and outcome if it existed?

Item 8: For exposures that can vary in amount or level, did the study examine different levels of the exposure as related to the outcome (e.g., categories of exposure, or exposure measured as continuous variable)?

Item 9: Were the exposure measures (independent variables) clearly defined, valid, reliable, and implemented consistently across all study participants?

Item 10: Was the exposure(s) assessed more than once over time?

Item 11: Were the outcome measures (dependent variables) clearly defined, valid, reliable, and implemented consistently across all study participants?

Item 12: Were the outcome assessors blinded to the exposure status of participants?

Item 13: Was loss to follow-up after baseline 20% or less?

Item 14: Were key potential confounding variables measured and adjusted statistically for their impact on the relationship between exposure(s) and outcome(s)?
