# Supplementary material
Source: PubMed Central journal article supplement (PMC9867543)
Supplement: 10389_2023_1825_MOESM3_ESM.pdf [file 10389_2023_1825_MOESM3_ESM.pdf]

**Association of socioeconomic status with cardiovascular disease and cardiovascular risk factors:  
A systematic review and meta-analysis**

Tao Wang, Yilin Li, Xiaoqiang Zheng\*

**\*corresponding author:** Xiaoqiang Zheng,  
School of Economics and Management, Southwest Petroleum University, Chengdu, China;  
Xiaoqiang\_Zheng@163.com

**Online Resource 3 The results of meta-analysis**

| outcome indicators | SES indicators     |                 | HR   | 95%CI |      | I <sup>2</sup> (%) | Q p-value |
|--------------------|--------------------|-----------------|------|-------|------|--------------------|-----------|
| CVD incidence      | Income             | Low vs. high    | 1.22 | 1.17  | 1.28 | 69.9               | 0         |
|                    |                    | Middle vs. high | 1.12 | 1.09  | 1.16 | 59.6               | 0.003     |
|                    | Male income        | Low vs. high    | 1.29 | 1.17  | 1.44 | 86.9               | 0         |
|                    |                    | Middle vs. high | 1.14 | 1.06  | 1.22 | 68.2               | 0.008     |
|                    | Female income      | Low vs. high    | 1.37 | 1.12  | 1.68 | 96                 | 0         |
|                    |                    | Middle vs. high | 1.18 | 1.13  | 1.24 | 0                  | 0.796     |
|                    | Income in LMICs    | Low vs. high    | 1.14 | 1.04  | 1.24 | 0                  | 0.96      |
|                    |                    | Middle vs. high | 1.06 | 0.99  | 1.15 | 55.8               | 0.104     |
|                    | Income in HICs     | Low vs. high    | 1.23 | 1.18  | 1.29 | 71.7               | 0         |
|                    |                    | Middle vs. high | 1.12 | 1.08  | 1.16 | 70.3               | 0         |
|                    | Education          | Low vs. high    | 1.44 | 1.28  | 1.63 | 72.8               | 0.001     |
|                    |                    | Middle vs. high | 1.2  | 1.11  | 1.3  | 52.5               | 0         |
|                    | Male education     | Low vs. high    | 1.51 | 1.29  | 1.76 | 77.4               | 0.004     |
|                    |                    | Middle vs. high | 1.25 | 1.2   | 1.29 | 0                  | 0.687     |
|                    | Female education   | Low vs. high    | 1.67 | 1.42  | 1.97 | 36.6               | 0.192     |
|                    |                    | Middle vs. high | 1.26 | 1.09  | 1.46 | 38.6               | 0.181     |
|                    | Education in LMICs | Low vs. high    | 1.52 | 1.09  | 2.11 | 70.9               | 0.032     |
|                    |                    | Middle vs. high | 1.4  | 0.92  | 2.12 | 81.2               | 0.005     |
|                    | Education in HICs  | Low vs. high    | 1.43 | 1.25  | 1.62 | 76.8               | 0         |
|                    |                    | Middle vs. high | 1.18 | 1.08  | 1.28 | 86.1               | 0         |
| Deprivation index  | Low vs. high       | 1.28            | 1.16 | 1.41  | 0    | 0.735              |           |
|                    | Middle vs. high    | 1.07            | 1.03 | 1.11  | 0    | 0.907              |           |
| CVD mortality      | Income             | Low vs. high    | 1.37 | 1.21  | 1.56 | 88.5               | 0         |
|                    |                    | Middle vs. high | 1.19 | 1.06  | 1.34 | 93.8               | 0         |

|                    |                 |      |      |      |      |       |
|--------------------|-----------------|------|------|------|------|-------|
| Male income        | Low vs. high    | 1.38 | 1.08 | 1.76 | 95.4 | 0     |
|                    | Middle vs. high | 1.08 | 0.94 | 1.25 | 93.1 | 0     |
| Female income      | Low vs. high    | 1.14 | 1.02 | 1.27 | 79.7 | 0.001 |
|                    | Middle vs. high | 0.99 | 0.92 | 1.06 | 66.9 | 0.017 |
| Income in LMICs    | Low vs. high    | 1.45 | 1.28 | 1.64 | 54.6 | 0.066 |
|                    | Middle vs. high | 1.18 | 1.06 | 1.32 | 50.6 | 0.088 |
| Income in HICs     | Low vs. high    | 1.33 | 1.13 | 1.57 | 87.5 | 0     |
|                    | Middle vs. high | 1.18 | 1.02 | 1.37 | 94.6 | 0     |
| Education          | Low vs. high    | 1.5  | 1.22 | 1.83 | 53.3 | 0.093 |
|                    | Middle vs. high | 1.13 | 1.05 | 1.22 | 0    | 0.86  |
| Education in LMICs | Low vs. high    | 1.66 | 1.24 | 2.21 | 57   | 0.072 |
|                    | Middle vs. high | 1.32 | 1.04 | 1.67 | 40.5 | 0.168 |
| Education in HICs  | Low vs. high    | 1.44 | 1.19 | 1.75 | 1.5  | 0.314 |
|                    | Middle vs. high | 1.12 | 1.03 | 1.21 | 0    | 0.564 |
| Deprivation index  | Low vs. high    | 1.19 | 1.11 | 1.29 | 72.1 | 0.003 |
|                    | Middle vs. high | 1.1  | 1.02 | 1.17 | 60.9 | 0.025 |

---

SES: socioeconomic status. HR: hazard ratio 95%CI: 95% confidence interval. Q p-value: p-value for Q test for heterogeneity. CVD: cardiovascular diseases. LMICs: low and middle-income countries. HICs: high-income countries.
