# Supplementary material
Source: PubMed Central journal article supplement (PMC9867543)
Supplement: 10389_2023_1825_MOESM4_ESM.pdf [file 10389_2023_1825_MOESM4_ESM.pdf]

**Online Resource 4 Egger's test results of publication bias**

| outcome indicators | SES indicators   | item  | Effective sizes | Standard error | t     | p     | 95%CI      |           |
|--------------------|------------------|-------|-----------------|----------------|-------|-------|------------|-----------|
| CVD incidence      | Income           | Slope | 0.1089385       | 0.0157715      | 6.91  | 0     | 0.0763877  | 0.1414894 |
|                    |                  | Bias  | 1.076416        | 0.5736431      | 1.88  | 0.073 | -0.1075256 | 2.260357  |
|                    | Male income      | Slope | 0.323015        | 0.0701234      | 4.61  | 0.001 | 0.1667703  | 0.4792598 |
|                    |                  | Bias  | -2.691273       | 1.74793        | -1.54 | 0.155 | -6.585905  | 1.203358  |
|                    | Female income    | Slope | 0.338525        | 0.1030058      | 3.29  | 0.008 | 0.1090139  | 0.5680362 |
|                    |                  | Bias  | -1.337603       | 2.176472       | -0.61 | 0.553 | -6.187084  | 3.511879  |
|                    | Income in LMICs  | Slope | 0.0404046       | 0.0636503      | 0.63  | 0.56  | -0.136317  | 0.2171262 |
|                    |                  | Bias  | 0.8220761       | 0.8774363      | 0.94  | 0.402 | -1.614078  | 3.25823   |
|                    | Income in HICs   | Slope | 0.1096596       | 0.0178269      | 6.15  | 0     | 0.0726888  | 0.1466305 |
|                    |                  | Bias  | 1.043953        | 0.6691674      | 1.56  | 0.133 | -0.3438153 | 2.431721  |
|                    | Education        | Slope | 0.1415964       | 0.0370145      | 3.83  | 0.002 | 0.0622082  | 0.2209846 |
|                    |                  | Bias  | 1.478094        | 0.8366572      | 1.77  | 0.099 | -0.3163572 | 3.272545  |
|                    | Male education   | Slope | 0.2183761       | 0.0292427      | 7.47  | 0     | 0.1468219  | 0.2899303 |
|                    |                  | Bias  | 1.537293        | 0.8674172      | 1.77  | 0.127 | -0.5852001 | 3.659787  |
|                    | Female education | Slope | 0.3522938       | 0.0790656      | 4.46  | 0.004 | 0.1588272  | 0.5457604 |

|  |                    |       |            |           |       |       |            |           |
|--|--------------------|-------|------------|-----------|-------|-------|------------|-----------|
|  |                    | Bias  | 0.2825397  | 1.405568  | 0.2   | 0.847 | -3.156762  | 3.721842  |
|  | Education in LMICs | Slope | 0.2039298  | 0.1580528 | 1.29  | 0.266 | -0.2348952 | 0.6427548 |
|  |                    | Bias  | 1.136853   | 1.639172  | 0.69  | 0.526 | -3.414219  | 5.687925  |
|  | Education in HICs  | Slope | 0.1365842  | 0.0439873 | 3.11  | 0.009 | 0.0407442  | 0.2324242 |
|  |                    | Bias  | 1.543205   | 1.063005  | 1.45  | 0.172 | -0.7728846 | 3.859295  |
|  | Deprivation index  | Slope | 0.1879876  | 0.061537  | 3.05  | 0.038 | 0.0171334  | 0.3588417 |
|  |                    | Bias  | -1.024404  | 4.159338  | -0.25 | 0.818 | -12.57258  | 10.52377  |
|  | Income             | Slope | -0.0357618 | 0.053222  | -0.67 | 0.509 | -0.1467809 | 0.0752573 |
|  |                    | Bias  | 3.682718   | 1.098811  | 3.35  | 0.003 | 1.390638   | 5.974798  |
|  | Male income        | Slope | 0.0529427  | 0.1523045 | 0.35  | 0.737 | -0.298272  | 0.4041574 |
|  |                    | Bias  | 2.5287     | 3.49143   | 0.72  | 0.49  | -5.522553  | 10.57995  |
|  | Female income      | Slope | -0.0311711 | 0.07258   | -0.43 | 0.679 | -0.1985408 | 0.1361987 |
|  |                    | Bias  | 1.589984   | 1.63131   | 0.97  | 0.358 | -2.171823  | 5.35179   |
|  | Income in LMICs    | Slope | 0.2149764  | 0.0734256 | 2.93  | 0.019 | 0.0456566  | 0.3842962 |
|  |                    | Bias  | 0.6229555  | 1.091239  | 0.57  | 0.584 | -1.893446  | 3.139357  |
|  | Income in HICs     | Slope | -0.0535163 | 0.057539  | -0.93 | 0.368 | -0.1769252 | 0.0698927 |
|  |                    | Bias  | 3.326557   | 1.230143  | 2.7   | 0.017 | 0.6881627  | 5.964952  |
|  | Education          | Slope | 0.117333   | 0.0921985 | 1.27  | 0.25  | -0.1082687 | 0.3429347 |
|  |                    | Bias  | 1.087609   | 0.9988207 | 1.09  | 0.318 | -1.356418  | 3.531635  |
|  | Education in LMICs | Slope | 0.321392   | 0.187278  | 1.72  | 0.161 | -0.198575  | 0.841359  |
|  |                    | Bias  | -0.2524981 | 1.206752  | -0.21 | 0.844 | -3.602978  | 3.097982  |
|  | Education in HICs  | Slope | 0.0856912  | 0.0947778 | 0.9   | 0.461 | -0.3221048 | 0.4934872 |

|                   |       |           |           |      |       |           |           |
|-------------------|-------|-----------|-----------|------|-------|-----------|-----------|
|                   | Bias  | 1.143266  | 1.26791   | 0.9  | 0.462 | -4.312108 | 6.598641  |
| Deprivation index | Slope | 0.0912542 | 0.0322404 | 2.83 | 0.018 | 0.019418  | 0.1630904 |
|                   | Bias  | 0.7906915 | 0.8672146 | 0.91 | 0.383 | -1.141583 | 2.722966  |

---

SES: socioeconomic status. 95%CI: 95% confidence interval. CVD: cardiovascular diseases. LMICs: low and middle-income countries. HICs: high-income countries.
