# Supplementary material
Source: PubMed Central journal article supplement (PMC9867543)
Supplement: 10389_2023_1825_MOESM5_ESM.pdf [file 10389_2023_1825_MOESM5_ESM.pdf]

(JOURNAL OF PUBLIC HEALTH)

**Association of socioeconomic status with cardiovascular disease and cardiovascular risk factors:  
A systematic review and meta-analysis**

Tao Wang, Yilin Li, Xiaoqiang Zheng\*

\*corresponding author: Xiaoqiang Zheng,

School of Economics and Management, Southwest Petroleum University, Chengdu, China;

Xiaoqiang\_Zheng@163.com

**Online Resource 5 Results of trim-and-fill method**

| <b>Outcome indicators</b> | <b>SES indicators</b> | <b>Method</b> | <b>Pooled Est</b> | <b>95% CI</b> |       | <b>p</b> | <b>No. of studies</b> |
|---------------------------|-----------------------|---------------|-------------------|---------------|-------|----------|-----------------------|
| CVD                       | Income                | Random        | 1.084             | 0.993         | 1.183 | 0.071    | 32                    |
| mortality                 | Income in HICs        | Random        | 1.068             | 0.955         | 1.193 | 0.249    | 22                    |
